# Supplementary material
Source: PubMed Central journal article supplement (PMC9444990)
Supplement: NIHMS1826961-supplement-Supplemental_Publication_Material.pdf [file NIHMS1826961-supplement-Supplemental_Publication_Material.pdf]

## SUPPLEMENTAL MATERIALS

### Contents

|                                                                                                                                      |   |
|--------------------------------------------------------------------------------------------------------------------------------------|---|
| Table S1. Baseline characteristics by CF-PWV tertile among participants of the FHS without DM.....                                   | 2 |
| Table S2. Baseline characteristics of FHS participants without baseline DM who underwent CF-PWV compared with those who did not..... | 4 |
| Table S3. Mediation analyses evaluating the relationship between CF-PWV, flow-mediated dilation, and incident DM in FHS.....         | 6 |
| Table S4. Odds of new onset diabetes by CF-PWV in the FHS using generalized estimating equations.....                                | 7 |
| Table S5. Sensitivity analyses using robust Mendelian randomization methods.....                                                     | 8 |

Table S1. Baseline characteristics by CF-PWV tertile among participants of the FHS without DM

|                                               | Lowest PWV Tertile | Middle PWV Tertile | Highest PWV Tertile |
|-----------------------------------------------|--------------------|--------------------|---------------------|
| N                                             | 1,920              | 1,905              | 1,851               |
| PWV, m/s                                      | 6.0 (5.6-6.3)      | 7.3 (7.0-7.7)      | 9.5 (8.7-11.2)      |
| Age, years                                    | 37 (31-43)         | 45 (39-52)         | 58 (51-67)          |
| Male sex, n (%)                               | 614 (32%)          | 975 (51%)          | 1,026 (55%)         |
| Current smoker, n (%)                         | 310 (16%)          | 300 (16%)          | 236 (13%)           |
| Family history of diabetes mellitus, n (%)    | 80 (4%)            | 133 (7%)           | 212 (11%)           |
| BMI, kg/m <sup>2</sup>                        | 24 (22-27)         | 26 (23-29)         | 28 (25-31)          |
| Waist circumference, in                       | 34 (31-37)         | 37 (34-40)         | 39 (26-43)          |
| Fasting blood glucose, mg/dl                  | 90 (85-94)         | 94 (89-100)        | 97 (92-104)         |
| Total cholesterol, mg/dl                      | 178 (157-201)      | 194 (173-218)      | 201 (177-225)       |
| Calculated LDL, mg/dl                         | 102 (83-123)       | 117 (97-137)       | 120 (99-143)        |
| HDL, mg/dl                                    | 56 (46-66)         | 52 (42-65)         | 51 (41-64)          |
| Triglycerides, mg/dl                          | 77 (57-108)        | 98 (72-141)        | 118 (83-168)        |
| eGFR, ml/min/1.73m <sup>2</sup>               | 108 (97-116)       | 101 (90-108)       | 88 (77-99)          |
| High-sensitivity c-reactive protein, mg/L     | 0.8 (0.4-2.2)      | 1.2 (0.5-2.8)      | 2.0 (0.9-4.4)       |
| SBP, mmHg                                     | 109 (102-116)      | 117 (109-126)      | 129 (120-141)       |
| DBP, mmHg                                     | 70 (65-76)         | 76 (70-82)         | 78 (71-85)          |
| MAP, mmHg                                     | 83 (78-89)         | 90 (84-96)         | 95 (88-102)         |
| Brachial PP, mmHg                             | 38 (33-44)         | 41 (36-47)         | 51 (42-62)          |
| Central PP, mmHg                              | 46 (40-53)         | 47 (40-55)         | 53 (43-64)          |
| Treated hypertension, n (%)                   | 80 (4%)            | 241 (13%)          | 502 (27%)           |
| Number of antihypertensive medications, n (%) |                    |                    |                     |
| 1                                             | 68 (4%)            | 178 (9%)           | 340 (18%)           |
| 2                                             | 12 (<1%)           | 50 (3%)            | 126 (7%)            |
| 3                                             | 0 (0%)             | 9 (<1%)            | 29 (2%)             |
| ≥4                                            | 0 (0%)             | 4 (<1%)            | 7 (<1%)             |
| Antihypertensive class                        |                    |                    |                     |
| Renin-angiotensin system blocker, n (%)       | 29 (2%)            | 103 (5%)           | 195 (11%)           |

|                                |             |             |            |
|--------------------------------|-------------|-------------|------------|
| Thiazide diuretic, n (%)       | 6 (<1%)     | 41 (2%)     | 99 (5%)    |
| Calcium channel blocker, n (%) | 5 (<1%)     | 44 (2%)     | 129 (7%)   |
| Beta-blocker, n (%)            | 38 (2%)     | 91 (5%)     | 186 (10%)  |
| Flow velocity, cm/s            | 57 (46-68)  | 53 (42-65)  | 40 (26-56) |
| Third generation, n (%)        | 1,771 (92%) | 1,388 (73%) | 594 (32%)  |

Continuous variables are reported as median (IQR)

*Abbreviations:* BMI = body mass index; CF-PWV = carotid-femoral pulse wave velocity; DBP = diastolic blood pressure; DM = diabetes mellitus; eGFR = estimated glomerular filtration rate (calculated using the Chronic Kidney Disease Epidemiology Collaboration equation); FHS = Framingham Heart Study; HDL = high density lipoprotein; LDL = low density lipoprotein; MAP = mean arterial pressure; PP = pulse pressure; SBP = systolic blood pressure.

Table S2. Baseline characteristics of FHS participants without baseline DM who underwent CF-PWV compared with those who did not.

|                                               | <b>FHS CF-PWV sub-cohort</b> | <b>FHS participants without CF-PWV</b> |
|-----------------------------------------------|------------------------------|----------------------------------------|
| N                                             | 5,676                        | 2,916                                  |
| Age, years                                    | 46 (37-55)                   | 56 (45-66)                             |
| Male sex, n (%)                               | 2,615 (46%)                  | 1,389 (48%)                            |
| Current smoker, n (%)                         | 846 (15%)                    | 193 (7%)                               |
| Family history of DM, n (%)                   | 425 (7%)                     | 196 (7%)                               |
| BMI, kg/m <sup>2</sup>                        | 26 (23-29)                   | 28 (25-32)                             |
| Waist circumference, in                       | 37 (33-40)                   | 39 (35-44)                             |
| Fasting blood glucose, mg/dl                  | 94 (88-100)                  | 96 (89-103)                            |
| Total cholesterol, mg/dl                      | 190 (168-215)                | 195 (170-219)                          |
| Calculated LDL, mg/dl                         | 113 (92-135)                 | 117 (94-139)                           |
| HDL, mg/dl                                    | 53 (43-65)                   | 51 (40-62)                             |
| Triglycerides, mg/dl                          | 109 (77-158)                 | 119 (84-167)                           |
| eGFR, ml/min/1.73m <sup>2</sup>               | 99 (87-109)                  | 93 (81-104)                            |
| High-sensitivity c-reactive protein, mg/L     | 1.3 (0.6-3.2)                | 2.5 (1.2-5.5)                          |
| SBP, mmHg                                     | 117 (108-128)                | 122 (112-135)                          |
| DBP, mmHg                                     | 75 (68-81)                   | 75 (69-81)                             |
| MAP, mmHg                                     | 89 (82-96)                   | 91 (84-98)                             |
| Brachial PP, mmHg                             | 42 (36-50)                   | 46 (39-57)                             |
| Central PP, mmHg                              | 48 (41-57)                   | 51 (42-60)                             |
| Treated hypertension, n (%)                   | 823 (15%)                    | 357 (12%)                              |
| Number of antihypertensive medications, n (%) |                              |                                        |
| 1                                             | 586 (10%)                    | 194 (7%)                               |
| 2                                             | 188 (3%)                     | 115 (4%)                               |
| 3                                             | 38 (1%)                      | 38 (1%)                                |
| ≥4                                            | 11 (<1%)                     | 10 (<1%)                               |

|                                         |          |          |
|-----------------------------------------|----------|----------|
| Antihypertensive class                  |          |          |
| Renin-angiotensin system blocker, n (%) | 327 (6%) | 121 (4%) |
| Thiazide diuretic, n (%)                | 146 (3%) | 89 (3%)  |
| Calcium channel blocker, n (%)          | 178 (3%) | 132 (5%) |
| Beta blocker, n (%)                     | 315 (6%) | 144 (5%) |

Continuous variables are reported as median (IQR)

*Abbreviations:* BMI = body mass index; CF-PWV = carotid-femoral pulse wave velocity; DBP = diastolic blood pressure; DM = diabetes mellitus; eGFR = estimated glomerular filtration rate (calculated using the Chronic Kidney Disease Epidemiology Collaboration equation); FHS = Framingham Heart Study; HDL = high density lipoprotein; LDL = low density lipoprotein; MAP = mean arterial pressure; PP = pulse pressure; SBP = systolic blood pressure.

Table S3. Mediation analyses evaluating the relationship between CF-PWV, flow-mediated dilation, and incident DM in FHS

|                                                  | sHR (95% CI)     | % Mediation   |
|--------------------------------------------------|------------------|---------------|
| <b>FHS</b>                                       |                  |               |
| CF-PWV (not adjusted for flow mediated dilation) | 1.36 (1.03-1.76) |               |
| CF-PWV (adjusted for flow mediated dilation)     | 1.26 (0.95-1.69) |               |
| Flow mediated dilation (adjusted for CF-PWV)     | 0.92 (0.78-1.08) | 9% (7%-11%)   |
| CF-PWV (not adjusted for fasting glucose)        | 1.36 (1.03-1.76) |               |
| CF-PWV (adjusted for fasting glucose)            | 1.10 (0.83-1.45) |               |
| Fasting blood glucose (adjusted for CF-PWV)      | 3.03 (2.56-3.59) | 55% (45%-68%) |

*Abbreviations:* CF-PWV = carotid-femoral pulse wave velocity; CI = confidence interval; DM = diabetes mellitus; FHS = Framingham Heart Study; sHR = standardized hazard ratios

All models are adjusted for age, sex, BMI, MAP, HR, eGFR, smoking, total cholesterol, high density lipoprotein, thiazide diuretic use, beta-blocker use, total number of antihypertensive medications, c-reactive protein, and family history of diabetes

Table S4. Odds of new onset diabetes by CF-PWV in the FHS using generalized estimating equations

|                         | Unadjusted       | Model 1*         | Model 2 <sup>†</sup> | Model 3 <sup>‡</sup> | Model 4 <sup>§</sup> |
|-------------------------|------------------|------------------|----------------------|----------------------|----------------------|
|                         | sOR (95% CI)     | sOR (95% CI)     | sOR (95% CI)         | sOR (95% CI)         | sOR (95% CI)         |
| CF-PWV                  | 2.07 (1.83-2.34) | 1.87 (1.53-2.30) | 1.56 (1.22-1.98)     | 1.52 (1.19-1.94)     | 1.41 (1.10-1.81)     |
| Brachial pulse pressure | 1.36 (1.28-1.46) | 1.29 (1.14-1.47) | 1.20 (1.05-1.38)     | 1.18 (1.03-1.36)     | 1.20 (1.04-1.39)     |
| Central pulse pressure  | 1.51 (1.37-1.66) | 1.36 (1.20-1.55) | 1.26 (1.08-1.47)     | 1.24 (1.06-1.45)     | 1.29 (1.10-1.52)     |

*Abbreviations:* CF-PWV = carotid-femoral pulse wave velocity; CI = confidence interval; FHS = Framingham Heart Study; FMD = flow mediated dilation (calculated as the difference in baseline mean flow and mean flow deflation); sOR = standardized odds ratio (calculated using generalized estimating equations accounting for clustering by family across cohorts, determined for each standard deviation increase in PWV)

\* Model 1: Adjusted for age, sex, and BMI

† Model 2: Adjusted for Model 1 + MAP and HR

‡ Model 3: Adjusted for Model 2 + eGFR

§ Model 4: Adjusted for Model 3 + smoking + total cholesterol + high density lipoprotein + thiazide diuretic + beta-blocker + total antihypertensive medications + family history of diabetes

Table S5. Sensitivity analyses using robust Mendelian randomization methods.\*

|                                              | <b>Mean arterial pressure</b> | <b>Brachial pulse pressure</b> |
|----------------------------------------------|-------------------------------|--------------------------------|
|                                              | sOR (95% CI)                  | sOR (95% CI)                   |
| <b>Univariable Mendelian Randomization</b>   |                               |                                |
| IVW                                          | 1.11 (1.03-1.21)              | 1.19 (1.07-1.32)               |
| Weighted median                              | 1.08 (1.04-1.12)              | 1.05 (1.00-1.11)               |
| MR-PRESSO                                    | 1.08 (1.05-1.12)              | 1.11 (1.05-1.16)               |
| MR-LASSO                                     | 1.08 (1.06-1.11)              | 1.08 (1.04-1.11)               |
| <b>Multivariable Mendelian Randomization</b> |                               |                                |
| IVW                                          | 1.03 (0.92-1.15)              | 1.16 (1.00-1.35)               |
| Weighted median                              | 1.07 (1.04-1.11)              | 1.02 (0.97-1.07)               |
| MR-PRESSO                                    | 1.05 (0.99-1.10)              | 1.06 (0.99-1.14)               |
| MR-LASSO                                     | 1.07 (1.02-1.13)              | 1.01 (0.96-1.07)               |

*Abbreviations:* CI = confidence interval; IVW = inverse variance weighting; MR-LASSO = Mendelian randomization least absolute shrinkage and selection operator; MR-PRESSO = Mendelian randomization pleiotropy residual sum and outlier; sOR = standardized odds ratio

\*Estimates represent odds ratios for type 2 diabetes standardized per 5 mmHg higher genetically-predicted levels of the blood pressure parameter
